# Supplementary material for: Discourse and Form Constraints on Licensing Object-First Sentences in German
Source: MDPI journal article supplement (doi:10.3390/languages6020082), 2021-04-30
Supplement: s1 [file s1]

This file contains the materials of Experiment 3 of the main text (Bader & Portele, Discourse and Form Constraints on Licensing Object-first Sentences in German). For reasons of clarity, only the variant of each sentence with either the subject or the object in the prefield is given. The four combinations of the factors *Pronoun* and *Syntactic Function of the Pronoun* are listed as shown below:

- a. = subject, p-pronoun
- b. = subject, d-pronoun
- c. = object, p-pronoun
- d. = object, d-pronoun

- 
- (1) a. Im Urlaub habe ich einen befreundeten Unternehmer getroffen. Er hat mich während einer Grillparty für ein gemeinsames Projekt gewinnen können.  
 b. Im Urlaub habe ich einen befreundeten Unternehmer getroffen. Der hat mich während einer Grillparty für ein gemeinsames Projekt gewinnen können.  
 c. Im Urlaub habe ich einen befreundeten Unternehmer getroffen. Ihn habe ich während einer Grillparty für ein gemeinsames Projekt gewinnen können.  
 d. Im Urlaub habe ich einen befreundeten Unternehmer getroffen. Den habe ich während einer Grillparty für ein gemeinsames Projekt gewinnen können.
- (2) a. Gestern habe ich ganz überraschend einen bekannten Sportler getroffen. Er hat mich ohne zu zögern zu einem Bier eingeladen.  
 b. Gestern habe ich ganz überraschend einen bekannten Sportler getroffen. Der hat mich ohne zu zögern zu einem Bier eingeladen.  
 c. Gestern habe ich ganz überraschend einen bekannten Sportler getroffen. Ihn habe ich ohne zu zögern zu einem Bier eingeladen.  
 d. Gestern habe ich ganz überraschend einen bekannten Sportler getroffen. Den habe ich ohne zu zögern zu einem Bier eingeladen.
- (3) a. Heute morgen habe ich einen wichtigen Kunden angerufen. Er hat mich dabei über ein neues Projekt informiert.  
 b. Heute morgen habe ich einen wichtigen Kunden angerufen. Der hat mich dabei über ein neues Projekt informiert.  
 c. Heute morgen habe ich einen wichtigen Kunden angerufen. Ihn habe ich dabei über ein neues Projekt informiert.  
 d. Heute morgen habe ich einen wichtigen Kunden angerufen. Den habe ich dabei über ein neues Projekt informiert.
- (4) a. Vor ein paar Wochen habe ich endlich einen kompetenten Sachbearbeiter gefunden. Er hat mich seitdem schon häufiger mal befragt.  
 b. Vor ein paar Wochen habe ich endlich einen kompetenten Sachbearbeiter gefunden. Der hat mich seitdem schon häufiger mal befragt.  
 c. Vor ein paar Wochen habe ich endlich einen kompetenten Sachbearbeiter gefunden. Ihn habe ich seitdem schon häufiger mal befragt.  
 d. Vor ein paar Wochen habe ich endlich einen kompetenten Sachbearbeiter gefunden. Den habe ich seitdem schon häufiger mal befragt.

- (5) a. Letzte Woche habe ich mit einem Spieler aus der ersten Mannschaft telefoniert. Er hat mich trotz Bedenken zu einer Verlängerung des Vertrages bewegt.  
b. Letzte Woche habe ich mit einem Spieler aus der ersten Mannschaft telefoniert. Der hat mich trotz Bedenken zu einer Verlängerung des Vertrages bewegt.  
c. Letzte Woche habe ich mit einem Spieler aus der ersten Mannschaft telefoniert. Ihn habe ich trotz Bedenken zu einer Verlängerung des Vertrages bewegt.  
d. Letzte Woche habe ich mit einem Spieler aus der ersten Mannschaft telefoniert. Den habe ich trotz Bedenken zu einer Verlängerung des Vertrages bewegt.
- (6) a. Gestern habe ich gegen einen ziemlich bekannten Schachspieler antreten müssen. Er hat mich in weniger als zwei Stunden in einer spannenden Partie besiegt.  
b. Gestern habe ich gegen einen ziemlich bekannten Schachspieler antreten müssen. Der hat mich in weniger als zwei Stunden in einer spannenden Partie besiegt.  
c. Gestern habe ich gegen einen ziemlich bekannten Schachspieler antreten müssen. Ihn habe ich in weniger als zwei Stunden in einer spannenden Partie besiegt.  
d. Gestern habe ich gegen einen ziemlich bekannten Schachspieler antreten müssen. Den habe ich in weniger als zwei Stunden in einer spannenden Partie besiegt.
- (7) a. Vor einigen Wochen habe ich intensiv mit einem anderen Lehrling geübt. Er hat mich mit viel Geduld für die Prüfungen fit gemacht.  
b. Vor einigen Wochen habe ich intensiv mit einem anderen Lehrling geübt. Der hat mich mit viel Geduld für die Prüfungen fit gemacht.  
c. Vor einigen Wochen habe ich intensiv mit einem anderen Lehrling geübt. Ihn habe ich mit viel Geduld für die Prüfungen fit gemacht.  
d. Vor einigen Wochen habe ich intensiv mit einem anderen Lehrling geübt. Den habe ich mit viel Geduld für die Prüfungen fit gemacht.
- (8) a. Gestern habe ich über eine Stunde lang mit einem Manager aus den USA verhandelt. Er hat mich leider nur sehr schlecht verstanden.  
b. Gestern habe ich über eine Stunde lang mit einem Manager aus den USA verhandelt. Der hat mich leider nur sehr schlecht verstanden.  
c. Gestern habe ich über eine Stunde lang mit einem Manager aus den USA verhandelt. Ihn habe ich leider nur sehr schlecht verstanden.  
d. Gestern habe ich über eine Stunde lang mit einem Manager aus den USA verhandelt. Den habe ich leider nur sehr schlecht verstanden.
- (9) a. Heute Vormittag habe ich vergeblich auf einen vermögenden Geschäftspartner gewartet. Er hat mich seitdem mehrmals zu kontaktieren versucht.  
b. Heute Vormittag habe ich vergeblich auf einen vermögenden Geschäftspartner gewartet. Der hat mich seitdem mehrmals zu kontaktieren versucht.  
c. Heute Vormittag habe ich vergeblich auf einen vermögenden Geschäftspartner gewartet. Ihn habe ich seitdem mehrmals zu kontaktieren versucht.  
d. Heute Vormittag habe ich vergeblich auf einen vermögenden Geschäftspartner gewartet. Den habe ich seitdem mehrmals zu kontaktieren versucht.
- (10) a. Heute Morgen habe ich einen einflussreichen Staatssekretär getroffen. Er hat mich schon zuvor mit kritischen Fragen auf die Probe gestellt.  
b. Heute Morgen habe ich einen einflussreichen Staatssekretär getroffen. Der hat mich schon zuvor mit kritischen Fragen auf die Probe gestellt.  
c. Heute Morgen habe ich einen einflussreichen Staatssekretär getroffen. Ihn habe ich schon zuvor mit kritischen Fragen auf die Probe gestellt.  
d. Heute Morgen habe ich einen einflussreichen Staatssekretär getroffen. Den habe ich schon zuvor mit kritischen Fragen auf die Probe gestellt.

- (11) a. Am Wochenende habe ich bei einem zwielichtigen Nachbarn geklingelt. Er hat mich zu Unrecht eines Diebstahls verdächtigt.  
b. Am Wochenende habe ich bei einem zwielichtigen Nachbarn geklingelt. Der hat mich zu Unrecht eines Diebstahls verdächtigt.  
c. Am Wochenende habe ich bei einem zwielichtigen Nachbarn geklingelt. Ihn habe ich zu Unrecht eines Diebstahls verdächtigt.  
d. Am Wochenende habe ich bei einem zwielichtigen Nachbarn geklingelt. Den habe ich zu Unrecht eines Diebstahls verdächtigt.
- (12) a. Vor fünf Minuten habe ich mit einem Zugbegleiter gesprochen. Er hat mich wie schon letzte Woche vor Hooligans im letzten Abteil warnen müssen.  
b. Vor fünf Minuten habe ich mit einem Zugbegleiter gesprochen. Der hat mich wie schon letzte Woche vor Hooligans im letzten Abteil warnen müssen.  
c. Vor fünf Minuten habe ich mit einem Zugbegleiter gesprochen. Ihn habe ich wie schon letzte Woche vor Hooligans im letzten Abteil warnen müssen.  
d. Vor fünf Minuten habe ich mit einem Zugbegleiter gesprochen. Den habe ich wie schon letzte Woche vor Hooligans im letzten Abteil warnen müssen.
- (13) a. Bei einem Kontrollgang habe ich plötzlich einen bedrohlich wirkenden Einbrecher entdeckt. Er hat mich trotz Gegenwehr außer Gefecht gesetzt.  
b. Bei einem Kontrollgang habe ich plötzlich einen bedrohlich wirkenden Einbrecher entdeckt. Der hat mich trotz Gegenwehr außer Gefecht gesetzt.  
c. Bei einem Kontrollgang habe ich plötzlich einen bedrohlich wirkenden Einbrecher entdeckt. Ihn habe ich trotz Gegenwehr außer Gefecht gesetzt.  
d. Bei einem Kontrollgang habe ich plötzlich einen bedrohlich wirkenden Einbrecher entdeckt. Den habe ich trotz Gegenwehr außer Gefecht gesetzt.
- (14) a. Nach dem Abendessen habe ich mit einem vielbeschäftigten Hausmann geredet. Er hat mich trotz des Abwaschs in ein Gespräch verwickelt.  
b. Nach dem Abendessen habe ich mit einem vielbeschäftigten Hausmann geredet. Der hat mich trotz des Abwaschs in ein Gespräch verwickelt.  
c. Nach dem Abendessen habe ich mit einem vielbeschäftigten Hausmann geredet. Ihn habe ich trotz des Abwaschs in ein Gespräch verwickelt.  
d. Nach dem Abendessen habe ich mit einem vielbeschäftigten Hausmann geredet. Den habe ich trotz des Abwaschs in ein Gespräch verwickelt.
- (15) a. Mitten in der Nacht habe ich durch Zufall einen verwirrten Patienten in der Teeküche angetroffen. Er hat mich mit allerlei Tricks über zwei Stunden beschäftigt.  
b. Mitten in der Nacht habe ich durch Zufall einen verwirrten Patienten in der Teeküche angetroffen. Der hat mich mit allerlei Tricks über zwei Stunden beschäftigt.  
c. Mitten in der Nacht habe ich durch Zufall einen verwirrten Patienten in der Teeküche angetroffen. Ihn habe ich mit allerlei Tricks über zwei Stunden beschäftigt.  
d. Mitten in der Nacht habe ich durch Zufall einen verwirrten Patienten in der Teeküche angetroffen. Den habe ich mit allerlei Tricks über zwei Stunden beschäftigt.
- (16) a. Letzten Herbst habe ich einen betrunkenen Jugendlichen auf einem Feld erwischt. Er hat mich spontan mit dem Handy fotografiert.  
b. Letzten Herbst habe ich einen betrunkenen Jugendlichen auf einem Feld erwischt. Der hat mich spontan mit dem Handy fotografiert.  
c. Letzten Herbst habe ich einen betrunkenen Jugendlichen auf einem Feld erwischt. Ihn habe ich spontan mit dem Handy fotografiert.  
d. Letzten Herbst habe ich einen betrunkenen Jugendlichen auf einem Feld erwischt. Den habe ich spontan mit dem Handy fotografiert.

- (17) a. Im vergangenen Jahr habe ich beim Verhandeln einen aufstrebenden Konkurrenten kennengelernt. Er hat mich beim letzten Treffen zu einer gesetzeswidrigen Kartellbildung überreden wollen.
- b. Im vergangenen Jahr habe ich beim Verhandeln einen aufstrebenden Konkurrenten kennengelernt. Der hat mich beim letzten Treffen zu einer gesetzeswidrigen Kartellbildung überreden wollen.
- c. Im vergangenen Jahr habe ich beim Verhandeln einen aufstrebenden Konkurrenten kennengelernt. Ihn habe ich beim letzten Treffen zu einer gesetzeswidrigen Kartellbildung überreden wollen.
- d. Im vergangenen Jahr habe ich beim Verhandeln einen aufstrebenden Konkurrenten kennengelernt. Den habe ich beim letzten Treffen zu einer gesetzeswidrigen Kartellbildung überreden wollen.
- (18) a. Im vergangenen Semester habe ich einem verzweifelten Medizinstudenten einen Fachrichtungswechsel empfohlen. Er hat mich dieses Semester schon mehrfach anzurufen versucht.
- b. Im vergangenen Semester habe ich einem verzweifelten Medizinstudenten einen Fachrichtungswechsel empfohlen. Der hat mich dieses Semester schon mehrfach anzurufen versucht.
- c. Im vergangenen Semester habe ich einem verzweifelten Medizinstudenten einen Fachrichtungswechsel empfohlen. Ihn habe ich dieses Semester schon mehrfach anzurufen versucht.
- d. Im vergangenen Semester habe ich einem verzweifelten Medizinstudenten einen Fachrichtungswechsel empfohlen. Den habe ich dieses Semester schon mehrfach anzurufen versucht.
- (19) a. Auf der Abschlussfeier habe ich einem langjährigen Schüler einen Kompass geschenkt. Er hat mich später zu einer Klettertour mitgenommen.
- b. Auf der Abschlussfeier habe ich einem langjährigen Schüler einen Kompass geschenkt. Der hat mich später zu einer Klettertour mitgenommen.
- c. Auf der Abschlussfeier habe ich einem langjährigen Schüler einen Kompass geschenkt. Ihn habe ich später zu einer Klettertour mitgenommen.
- d. Auf der Abschlussfeier habe ich einem langjährigen Schüler einen Kompass geschenkt. Den habe ich später zu einer Klettertour mitgenommen.
- (20) a. Gerade eben habe ich einen ehemaligen Chefarzt auf dem Flur gesehen. Er hat mich wegen eines früheren Streits einfach ignoriert.
- b. Gerade eben habe ich einen ehemaligen Chefarzt auf dem Flur gesehen. Der hat mich wegen eines früheren Streits einfach ignoriert.
- c. Gerade eben habe ich einen ehemaligen Chefarzt auf dem Flur gesehen. Ihn habe ich wegen eines früheren Streits einfach ignoriert.
- d. Gerade eben habe ich einen ehemaligen Chefarzt auf dem Flur gesehen. Den habe ich wegen eines früheren Streits einfach ignoriert.
- (21) a. Vor einer Stunde habe ich einen einflussreichen Politiker gesehen. Er hat mich heute Morgen um ein persönliches Gespräch gebeten.
- b. Vor einer Stunde habe ich einen einflussreichen Politiker gesehen. Der hat mich heute Morgen um ein persönliches Gespräch gebeten.
- c. Vor einer Stunde habe ich einen einflussreichen Politiker gesehen. Ihn habe ich heute Morgen um ein persönliches Gespräch gebeten.
- d. Vor einer Stunde habe ich einen einflussreichen Politiker gesehen. Den habe ich heute Morgen um ein persönliches Gespräch gebeten.

- (22) a. Am Freitag habe ich am Flughafen zufällig einen befreundeten Musiker getroffen. Er hat mich letztes Jahr bei mehreren Konzerten begleitet.  
b. Am Freitag habe ich am Flughafen zufällig einen befreundeten Musiker getroffen. Der hat mich letztes Jahr bei mehreren Konzerten begleitet.  
c. Am Freitag habe ich am Flughafen zufällig einen befreundeten Musiker getroffen. Ihn habe ich letztes Jahr bei mehreren Konzerten begleitet.  
d. Am Freitag habe ich am Flughafen zufällig einen befreundeten Musiker getroffen. Den habe ich letztes Jahr bei mehreren Konzerten begleitet.
- (23) a. In den Sommerferien habe ich mit einem erfolgreichen Anwalt das Tauchen gelernt. Er hat mich schon in der Studienzeit als verlässlichen Partner kennengelernt.  
b. In den Sommerferien habe ich mit einem erfolgreichen Anwalt das Tauchen gelernt. Der hat mich schon in der Studienzeit als verlässlichen Partner kennengelernt.  
c. In den Sommerferien habe ich mit einem erfolgreichen Anwalt das Tauchen gelernt. Ihn habe ich schon in der Studienzeit als verlässlichen Partner kennengelernt.  
d. In den Sommerferien habe ich mit einem erfolgreichen Anwalt das Tauchen gelernt. Den habe ich schon in der Studienzeit als verlässlichen Partner kennengelernt.
- (24) a. Am Freitag habe ich einen ehemaligen Lehrer bei einem Fußballspiel getroffen. Er hat mich schon während der Schulzeit als fanatischen Fan erlebt.  
b. Am Freitag habe ich einen ehemaligen Lehrer bei einem Fußballspiel getroffen. Der hat mich schon während der Schulzeit als fanatischen Fan erlebt.  
c. Am Freitag habe ich einen ehemaligen Lehrer bei einem Fußballspiel getroffen. Ihn habe ich schon während der Schulzeit als fanatischen Fan erlebt.  
d. Am Freitag habe ich einen ehemaligen Lehrer bei einem Fußballspiel getroffen. Den habe ich schon während der Schulzeit als fanatischen Fan erlebt.
- (25) a. Am Wochenende habe ich glücklicherweise einen bekannten Schauspieler fotografieren können. Er hat mich gleich danach zu einem Pressegespräch mitnehmen wollen.  
b. Am Wochenende habe ich glücklicherweise einen bekannten Schauspieler fotografieren können. Der hat mich gleich danach zu einem Pressegespräch mitnehmen wollen.  
c. Am Wochenende habe ich glücklicherweise einen bekannten Schauspieler fotografieren können. Ihn habe ich gleich danach zu einem Pressegespräch mitnehmen wollen.  
d. Am Wochenende habe ich glücklicherweise einen bekannten Schauspieler fotografieren können. Den habe ich gleich danach zu einem Pressegespräch mitnehmen wollen.
- (26) a. Gestern Abend habe ich einen Vertrauten der Kanzlerin interviewt. Er hat mich auf einer Pressekonferenz schon mal angesprochen.  
b. Gestern Abend habe ich einen Vertrauten der Kanzlerin interviewt. Der hat mich auf einer Pressekonferenz schon mal angesprochen.  
c. Gestern Abend habe ich einen Vertrauten der Kanzlerin interviewt. Ihn habe ich auf einer Pressekonferenz schon mal angesprochen.  
d. Gestern Abend habe ich einen Vertrauten der Kanzlerin interviewt. Den habe ich auf einer Pressekonferenz schon mal angesprochen.
- (27) a. Im Sommer habe ich einen in Frankreich lebenden Onkel besucht. Er hat mich

- erst vor kurzem ausfindig machen können.
- b. Im Sommer habe ich einen in Frankreich lebenden Onkel besucht. Der hat mich erst vor kurzem ausfindig machen können.
- c. Im Sommer habe ich einen in Frankreich lebenden Onkel besucht. Ihn habe ich erst vor kurzem ausfindig machen können.
- d. Im Sommer habe ich einen in Frankreich lebenden Onkel besucht. Den habe ich erst vor kurzem ausfindig machen können.
- (28) a. Schon mehrfach habe ich einen bekannten Abt nach Rom begleitet. Er hat mich neulich als Berater ins Kloster eingeladen.
- b. Schon mehrfach habe ich einen bekannten Abt nach Rom begleitet. Der hat mich neulich als Berater ins Kloster eingeladen.
- c. Schon mehrfach habe ich einen bekannten Abt nach Rom begleitet. Ihn habe ich neulich als Berater ins Kloster eingeladen.
- d. Schon mehrfach habe ich einen bekannten Abt nach Rom begleitet. Den habe ich neulich als Berater ins Kloster eingeladen.
- (29) a. Auf der Buchmesse habe ich mit einem erfahrenen Lektor gestritten. Er hat mich unvermittelt als Banausen und Kleingeist bezeichnet.
- b. Auf der Buchmesse habe ich mit einem erfahrenen Lektor gestritten. Der hat mich unvermittelt als Banausen und Kleingeist bezeichnet.
- c. Auf der Buchmesse habe ich mit einem erfahrenen Lektor gestritten. Ihn habe ich unvermittelt als Banausen und Kleingeist bezeichnet.
- d. Auf der Buchmesse habe ich mit einem erfahrenen Lektor gestritten. Den habe ich unvermittelt als Banausen und Kleingeist bezeichnet.
- (30) a. Vor ein paar Stunden habe ich gegen einen alternden Rivalen gespielt. Er hat mich in der Vergangenheit bereits vier Mal geschlagen.
- b. Vor ein paar Stunden habe ich gegen einen alternden Rivalen gespielt. Der hat mich in der Vergangenheit bereits vier Mal geschlagen.
- c. Vor ein paar Stunden habe ich gegen einen alternden Rivalen gespielt. Ihn habe ich in der Vergangenheit bereits vier Mal geschlagen.
- d. Vor ein paar Stunden habe ich gegen einen alternden Rivalen gespielt. Den habe ich in der Vergangenheit bereits vier Mal geschlagen.
- (31) a. Bei der Preisverleihung habe ich kurz mit einem ehemaligen Schüler gesprochen. Er hat mich damals häufig kritisiert.
- b. Bei der Preisverleihung habe ich kurz mit einem ehemaligen Schüler gesprochen. Der hat mich damals häufig kritisiert.
- c. Bei der Preisverleihung habe ich kurz mit einem ehemaligen Schüler gesprochen. Ihn habe ich damals häufig kritisiert.
- d. Bei der Preisverleihung habe ich kurz mit einem ehemaligen Schüler gesprochen. Den habe ich damals häufig kritisiert.
- (32) a. Den ganzen Sommer über habe ich mit einem begehrten Schlagzeuger eine Tour durch Europa gemacht. Er hat mich schon seit langem als Live-Instrumentalisten zu schätzen gewusst.
- b. Den ganzen Sommer über habe ich mit einem begehrten Schlagzeuger eine Tour durch Europa gemacht. Der hat mich schon seit langem als Live-Instrumentalisten zu schätzen gewusst.
- c. Den ganzen Sommer über habe ich mit einem begehrten Schlagzeuger eine Tour durch Europa gemacht. Ihn habe ich schon seit langem als Live-Instrumentalisten zu schätzen gewusst.

- d. Den ganzen Sommer über habe ich mit einem beehrten Schlagzeuger eine Tour durch Europa gemacht. Den habe ich schon seit langem als Live-Instrumentalisten zu schätzen gewusst.
- (33) a. Gestern habe ich einen neugierigen Azubi gefeuert. Er hat mich letzte Woche beim Faulenzen erwischt.  
b. Gestern habe ich einen neugierigen Azubi gefeuert. Der hat mich letzte Woche beim Faulenzen erwischt.  
c. Gestern habe ich einen neugierigen Azubi gefeuert. Ihn habe ich letzte Woche beim Faulenzen erwischt.  
d. Gestern habe ich einen neugierigen Azubi gefeuert. Den habe ich letzte Woche beim Faulenzen erwischt.
- (34) a. Auf der Vernisage habe ich einen einflussreichen Galeristen kennengelernt. Er hat mich während der Podiumsdiskussion mehrfach lobend erwähnt.  
b. Auf der Vernisage habe ich einen einflussreichen Galeristen kennengelernt. Der hat mich während der Podiumsdiskussion mehrfach lobend erwähnt.  
c. Auf der Vernisage habe ich einen einflussreichen Galeristen kennengelernt. Ihn habe ich während der Podiumsdiskussion mehrfach lobend erwähnt.  
d. Auf der Vernisage habe ich einen einflussreichen Galeristen kennengelernt. Den habe ich während der Podiumsdiskussion mehrfach lobend erwähnt.
- (35) a. Letzten Monat habe ich eine Bewährungsstrafe für einen schwierigen Klienten erwirkt. Er hat mich seitdem regelmäßig kontaktieren müssen.  
b. Letzten Monat habe ich eine Bewährungsstrafe für einen schwierigen Klienten erwirkt. Der hat mich seitdem regelmäßig kontaktieren müssen.  
c. Letzten Monat habe ich eine Bewährungsstrafe für einen schwierigen Klienten erwirkt. Ihn habe ich seitdem regelmäßig kontaktieren müssen.  
d. Letzten Monat habe ich eine Bewährungsstrafe für einen schwierigen Klienten erwirkt. Den habe ich seitdem regelmäßig kontaktieren müssen.
- (36) a. Am Sonntag habe ich einen neu eingezogenen Hausbewohner besucht. Er hat mich zuvor telefonisch in unserer Wohnanlage begrüßt.  
b. Am Sonntag habe ich einen neu eingezogenen Hausbewohner besucht. Der hat mich zuvor telefonisch in unserer Wohnanlage begrüßt.  
c. Am Sonntag habe ich einen neu eingezogenen Hausbewohner besucht. Ihn habe ich zuvor telefonisch in unserer Wohnanlage begrüßt.  
d. Am Sonntag habe ich einen neu eingezogenen Hausbewohner besucht. Den habe ich zuvor telefonisch in unserer Wohnanlage begrüßt.
- (37) a. Beim letzten Turnier habe ich einen aggressiven Gegenspieler in drei Sätzen schlagen können. Er hat mich dabei mehrmals beschimpft.  
b. Beim letzten Turnier habe ich einen aggressiven Gegenspieler in drei Sätzen schlagen können. Der hat mich dabei mehrmals beschimpft.  
c. Beim letzten Turnier habe ich einen aggressiven Gegenspieler in drei Sätzen schlagen können. Ihn habe ich dabei mehrmals beschimpft.  
d. Beim letzten Turnier habe ich einen aggressiven Gegenspieler in drei Sätzen schlagen können. Den habe ich dabei mehrmals beschimpft.
- (38) a. Nach meinem letzten Experiment habe ich einen weiteren Doktoranden eingestellt. Er hat mich vorher auf einer Konferenz um Kontaktdaten gebeten.  
b. Nach meinem letzten Experiment habe ich einen weiteren Doktoranden eingestellt. Der hat mich vorher auf einer Konferenz um Kontaktdaten gebeten.

- c. Nach meinem letzten Experiment habe ich einen weiteren Doktoranden eingestellt. Ihn habe ich vorher auf einer Konferenz um Kontaktdaten gebeten.
  - d. Nach meinem letzten Experiment habe ich einen weiteren Doktoranden eingestellt. Den habe ich vorher auf einer Konferenz um Kontaktdaten gebeten.
- (39)
- a. Auf der Veranstaltung habe ich mit einem arroganten Pressesprecher gestritten. Er hat mich im Vorfeld der Korruption bezichtigt.
  - b. Auf der Veranstaltung habe ich mit einem arroganten Pressesprecher gestritten. Der hat mich im Vorfeld der Korruption bezichtigt.
  - c. Auf der Veranstaltung habe ich mit einem arroganten Pressesprecher gestritten. Ihn habe ich im Vorfeld der Korruption bezichtigt.
  - d. Auf der Veranstaltung habe ich mit einem arroganten Pressesprecher gestritten. Den habe ich im Vorfeld der Korruption bezichtigt.
- (40)
- a. An Weihnachten habe ich besonders an meinen jüngsten Enkel denken müssen. Er hat mich bei der Bescherung im Jahr davor doch tatsächlich vergessen.
  - b. An Weihnachten habe ich besonders an meinen jüngsten Enkel denken müssen. Der hat mich bei der Bescherung im Jahr davor doch tatsächlich vergessen.
  - c. An Weihnachten habe ich besonders an meinen jüngsten Enkel denken müssen. Ihn habe ich bei der Bescherung im Jahr davor doch tatsächlich vergessen.
  - d. An Weihnachten habe ich besonders an meinen jüngsten Enkel denken müssen. Den habe ich bei der Bescherung im Jahr davor doch tatsächlich vergessen.
