# Supplementary material for: Discourse and Form Constraints on Licensing Object-First Sentences in German
Source: MDPI journal article supplement (doi:10.3390/languages6020082), 2021-04-30
Supplement: s1 [file s1]

This file contains the material of Experiment 2 of the main text (Bader & Portele, Discourse and Form Constraints on Licensing Object-first Sentences in German). For reasons of clarity, only the subject-object variant of each sentence is given. The four combinations of the factors *Form of the Subject* and *Referential Dependence of the Subject* are listed as shown below:

- a. = referentially independent, pronominal subject
- b. = referentially independent, non-pronominal subject
- c. = referentially dependent, pronominal subject
- d. = referentially dependent, non-pronominal subject

- 
- (1) a. Im Urlaub habe ich einen befreundeten Unternehmer getroffen. Ich habe den während einer Grillparty für ein gemeinsames Projekt gewinnen können.  
 b. Im Urlaub habe ich einen befreundeten Unternehmer getroffen. Ein Wissenschaftler hat den während einer Grillparty für ein gemeinsames Projekt gewinnen können.  
 c. Im Urlaub hat ein Wissenschaftler einen befreundeten Unternehmer getroffen. Er hat den während einer Grillparty für ein gemeinsames Projekt gewinnen können.  
 d. Im Urlaub hat ein Wissenschaftler einen befreundeten Unternehmer getroffen. Der Wissenschaftler hat den während einer Grillparty für ein gemeinsames Projekt gewinnen können.
- (2) a. Gestern habe ich ganz überraschend einen bekannten Sportler getroffen. Ich habe den gleich zu einem Bier eingeladen.  
 b. Gestern habe ich ganz überraschend einen bekannten Sportler getroffen. Ein Vereinskamerad hat den gleich zu einem Bier eingeladen.  
 c. Gestern hat ein Vereinskamerad ganz überraschend einen bekannten Sportler getroffen. Er hat den gleich zu einem Bier eingeladen.  
 d. Gestern hat ein Vereinskamerad ganz überraschend einen bekannten Sportler getroffen. Der Vereinskamerad hat den gleich zu einem Bier eingeladen.
- (3) a. Heute morgen habe ich einen wichtigen Kunden angerufen. Ich habe den vor kurzem über das neue Produkt informiert.  
 b. Heute morgen habe ich einen wichtigen Kunden angerufen. Ein Arbeitskollege hat den vor kurzem über das neue Produkt informiert.  
 c. Heute morgen hat ein Arbeitskollege einen wichtigen Kunden angerufen. Er hat den vor kurzem über das neue Produkt informiert.  
 d. Heute morgen hat ein Arbeitskollege einen wichtigen Kunden angerufen. Der Arbeitskollege hat den vor kurzem über das neue Produkt informiert.
- (4) a. Vor ein paar Wochen habe ich endlich einen kompetenten Sachbearbeiter gefunden. Ich habe den seitdem schon häufiger mal befragt.  
 b. Vor ein paar Wochen habe ich endlich einen kompetenten Sachbearbeiter gefunden. Ein Abteilungsleiter hat den seitdem schon häufiger mal befragt.  
 c. Vor ein paar Wochen hat ein Abteilungsleiter endlich einen kompetenten Sachbearbeiter gefunden. Er hat den seitdem schon häufiger mal befragt.  
 d. Vor ein paar Wochen hat ein Abteilungsleiter endlich einen kompetenten Sachbearbeiter gefunden. Der Abteilungsleiter hat den seitdem schon häufiger mal befragt.

- (5) a. Letzte Woche habe ich mit einem Spieler aus der ersten Mannschaft telefoniert. Ich habe den zu einer Verlängerung seines Vertrages bewegt.  
b. Letzte Woche habe ich mit einem Spieler aus der ersten Mannschaft telefoniert. Ein Sponsor hat den zu einer Verlängerung seines Vertrages bewegt.  
c. Letzte Woche hat ein Sponsor mit einem Spieler aus der ersten Mannschaft telefoniert. Er hat den zu einer Verlängerung seines Vertrages bewegt.  
d. Letzte Woche hat ein Sponsor mit einem Spieler aus der ersten Mannschaft telefoniert. Der Sponsor hat den zu einer Verlängerung seines Vertrages bewegt.
- (6) a. Gestern habe ich gegen einen ziemlich bekannten Schachspieler antreten müssen. Ich habe den nur mit sehr viel Glück besiegen können.  
b. Gestern habe ich gegen einen ziemlich bekannten Schachspieler antreten müssen. Ein Profi hat den nur mit sehr viel Glück besiegen können.  
c. Gestern hat ein Profi gegen einen ziemlich bekannten Schachspieler antreten müssen. Er hat den nur mit sehr viel Glück besiegen können.  
d. Gestern hat ein Profi gegen einen ziemlich bekannten Schachspieler antreten müssen. Der Profi hat den nur mit sehr viel Glück besiegen können.
- (7) a. Vor einigen Wochen habe ich intensiv mit einem etwas schwierigen Lehrling geübt. Ich habe den für die Prüfungen fit gemacht.  
b. Vor einigen Wochen habe ich intensiv mit einem etwas schwierigen Lehrling geübt. Ein Meister hat den für die Prüfungen fit gemacht.  
c. Vor einigen Wochen hat ein Meister intensiv mit einem etwas schwierigen Lehrling geübt. Er hat den für die Prüfungen fit gemacht.  
d. Vor einigen Wochen hat ein Meister intensiv mit einem etwas schwierigen Lehrling geübt. Der Meister hat den für die Prüfungen fit gemacht.
- (8) a. Gestern habe ich über eine Stunde lang mit einem Manager aus den USA verhandelt. Ich habe den leider nur sehr schlecht verstanden.  
b. Gestern habe ich über eine Stunde lang mit einem Manager aus den USA verhandelt. Ein Kollege hat den leider nur sehr schlecht verstanden.  
c. Gestern hat ein Kollege über eine Stunde lang mit einem Manager aus den USA verhandelt. Er hat den leider nur sehr schlecht verstanden.  
d. Gestern hat ein Kollege über eine Stunde lang mit einem Manager aus den USA verhandelt. Der Kollege hat den leider nur sehr schlecht verstanden.
- (9) a. Heute Vormittag habe ich vergeblich auf einen vermögenden Geschäftspartner gewartet. Ich habe den seitdem mehrmals zu kontaktieren versucht.  
b. Heute Vormittag habe ich vergeblich auf einen vermögenden Geschäftspartner gewartet. Ein Firmensprecher hat den seitdem mehrmals zu kontaktieren versucht.  
c. Heute Vormittag hat ein Firmensprecher vergeblich auf einen vermögenden Geschäftspartner gewartet. Er hat den seitdem mehrmals zu kontaktieren versucht.  
d. Heute Vormittag hat ein Firmensprecher vergeblich auf einen vermögenden Geschäftspartner gewartet. Der Firmensprecher hat den seitdem mehrmals zu kontaktieren versucht.
- (10) a. Heute Morgen habe ich einen einflussreichen Staatssekretär getroffen. Ich habe den bereits mit kritischen Fragen auf die Probe gestellt.  
b. Heute Morgen habe ich einen einflussreichen Staatssekretär getroffen. Ein Journalist hat den bereits mit kritischen Fragen auf die Probe gestellt.  
c. Heute Morgen hat ein Journalist einen einflussreichen Staatssekretär getroffen. Er hat den bereits mit kritischen Fragen auf die Probe gestellt.  
d. Heute Morgen hat ein Journalist einen einflussreichen Staatssekretär getroffen.

Der Journalist hat den bereits mit kritischen Fragen auf die Probe gestellt.

- (11) a. Am Wochenende habe ich bei einem zwielichtigen Nachbarn geklingelt. Ich habe den völlig zu Recht eines Diebstahls verdächtigt.  
b. Am Wochenende habe ich bei einem zwielichtigen Nachbarn geklingelt. Ein Inspektor hat den völlig zu Recht eines Diebstahls verdächtigt.  
c. Am Wochenende hat ein Inspektor bei einem zwielichtigen Nachbarn geklingelt. Er hat den völlig zu Recht eines Diebstahls verdächtigt.  
d. Am Wochenende hat ein Inspektor bei einem zwielichtigen Nachbarn geklingelt. Der Inspektor hat den völlig zu Recht eines Diebstahls verdächtigt.
- (12) a. Vor fünf Minuten habe ich mit einem erfahrenen Zugbegleiter gesprochen. Ich habe den vor den Hooligans im letzten Abteil gewarnt.  
b. Vor fünf Minuten habe ich mit einem erfahrenen Zugbegleiter gesprochen. Ein Fahrgast hat den vor den Hooligans im letzten Abteil gewarnt.  
c. Vor fünf Minuten hat ein Fahrgast mit einem erfahrenen Zugbegleiter gesprochen. Er hat den vor den Hooligans im letzten Abteil gewarnt.  
d. Vor fünf Minuten hat ein Fahrgast mit einem erfahrenen Zugbegleiter gesprochen. Der Fahrgast hat den vor den Hooligans im letzten Abteil gewarnt.
- (13) a. Bei einem Kontrollgang habe ich plötzlich einen bedrohlich wirkenden Einbrecher entdeckt. Ich habe den glücklicherweise vertreiben können.  
b. Bei einem Kontrollgang habe ich plötzlich einen bedrohlich wirkenden Einbrecher entdeckt. Ein Wachmann hat den glücklicherweise vertreiben können.  
c. Bei einem Kontrollgang hat ein Wachmann plötzlich einen bedrohlich wirkenden Einbrecher entdeckt. Er hat den glücklicherweise vertreiben können.  
d. Bei einem Kontrollgang hat ein Wachmann plötzlich einen bedrohlich wirkenden Einbrecher entdeckt. Der Wachmann hat den glücklicherweise vertreiben können.
- (14) a. Während des Abwaschs habe ich mit einem vielbeschäftigten Hausmann geredet. Ich habe den trotz des vielen Geschirrs in ein Gespräch verwickelt.  
b. Während des Abwaschs habe ich mit einem vielbeschäftigten Hausmann geredet. Ein Versicherungsvertreter hat den trotz des vielen Geschirrs in ein Gespräch verwickelt.  
c. Während des Abwaschs hat ein Versicherungsvertreter mit einem vielbeschäftigten Hausmann geredet. Er hat den trotz des vielen Geschirrs in ein Gespräch verwickelt.  
d. Während des Abwaschs hat ein Versicherungsvertreter mit einem vielbeschäftigten Hausmann geredet. Der Versicherungsvertreter hat den trotz des vielen Geschirrs in ein Gespräch verwickelt.
- (15) a. Mitten in der Nacht habe ich durch Zufall einen verwirrten Patienten auf dem Dach entdeckt. Ich habe den zum Glück problemlos wieder heruntergebracht.  
b. Mitten in der Nacht habe ich durch Zufall einen verwirrten Patienten auf dem Dach entdeckt. Ein Stationsarzt hat den zum Glück problemlos wieder heruntergebracht.  
c. Mitten in der Nacht hat ein Stationsarzt durch Zufall einen verwirrten Patienten auf dem Dach entdeckt. Er hat den zum Glück problemlos wieder heruntergebracht.  
d. Mitten in der Nacht hat ein Stationsarzt durch Zufall einen verwirrten Patienten auf dem Dach entdeckt. Der Stationsarzt hat den zum Glück problemlos wieder heruntergebracht.

- (16) a. Letzten Herbst habe ich einen betrunkenen Jugendlichen auf einem Feld erwischt. Ich habe den gemeinerweise heimlich mit dem Handy fotografiert.
- b. Letzten Herbst habe ich einen betrunkenen Jugendlichen auf einem Feld erwischt. Ein Spaziergänger hat den gemeinerweise heimlich mit dem Handy fotografiert.
- c. Letzten Herbst hat ein Spaziergänger einen betrunkenen Jugendlichen auf einem Feld erwischt. Er hat den gemeinerweise heimlich mit dem Handy fotografiert.
- d. Letzten Herbst hat ein Spaziergänger einen betrunkenen Jugendlichen auf einem Feld erwischt. Der Spaziergänger hat den gemeinerweise heimlich mit dem Handy fotografiert.
- (17) a. Im letzten Quartal habe ich beim Verhandeln einen aufstrebenden Konkurrenten kennengelernt. Ich habe den zu einer gesetzeswidrigen Kartellbildung überreden wollen.
- b. Im letzten Quartal habe ich beim Verhandeln einen aufstrebenden Konkurrenten kennengelernt. Ein Manager hat den zu einer gesetzeswidrigen Kartellbildung überreden wollen.
- c. Im letzten Quartal hat ein Manager beim Verhandeln einen aufstrebenden Konkurrenten kennengelernt. Er hat den zu einer gesetzeswidrigen Kartellbildung überreden wollen.
- d. Im letzten Quartal hat ein Manager beim Verhandeln einen aufstrebenden Konkurrenten kennengelernt. Der Manager hat den zu einer gesetzeswidrigen Kartellbildung überreden wollen.
- (18) a. Im vergangenen Semester habe ich einem verzweifelten Medizinstudenten einen Fachrichtungswechsel empfohlen. Ich habe den trotzdem wieder in mehreren Vorlesungen gesehen.
- b. Im vergangenen Semester habe ich einem verzweifelten Medizinstudenten einen Fachrichtungswechsel empfohlen. Ein Mitbewohner hat den trotzdem wieder in mehreren Vorlesungen gesehen.
- c. Im vergangenen Semester hat ein Mitbewohner einem verzweifelten Medizinstudenten einen Fachrichtungswechsel empfohlen. Er hat den trotzdem wieder in mehreren Vorlesungen gesehen.
- d. Im vergangenen Semester hat ein Mitbewohner einem verzweifelten Medizinstudenten einen Fachrichtungswechsel empfohlen. Der Mitbewohner hat den trotzdem wieder in mehreren Vorlesungen gesehen.
- (19) a. Auf der Abschlussfeier habe ich einem langjährigen Schüler einen Kompass geschenkt. Ich habe den zu einem Eintritt in die Armee ermutigt.
- b. Auf der Abschlussfeier habe ich einem langjährigen Schüler einen Kompass geschenkt. Ein Lehrer hat den zu einem Eintritt in die Armee ermutigt.
- c. Auf der Abschlussfeier hat ein Lehrer einem langjährigen Schüler einen Kompass geschenkt. Er hat den zu einem Eintritt in die Armee ermutigt.
- d. Auf der Abschlussfeier hat ein Lehrer einem langjährigen Schüler einen Kompass geschenkt. Der Lehrer hat den zu einem Eintritt in die Armee ermutigt.
- (20) a. Gerade eben habe ich einen aufgeregten Mann auf dem Flur getroffen. Ich habe den von der Krankheit seines Kindes unterrichten müssen.
- b. Gerade eben habe ich einen aufgeregten Mann auf dem Flur getroffen. Ein Oberarzt hat den von der Krankheit seines Kindes unterrichten müssen.
- c. Gerade eben hat ein Oberarzt einen aufgeregten Mann auf dem Flur getroffen. Er hat den von der Krankheit seines Kindes unterrichten müssen.
- d. Gerade eben hat ein Oberarzt einen aufgeregten Mann auf dem Flur getroffen. Der

- Oberarzt hat den von der Krankheit seines Kindes unterrichten müssen.
- (21) a. Vor einer Stunde habe ich einen einflussreichen Politiker gesehen. Ich habe den heute Morgen um ein persönliches Gespräch gebeten.  
b. Vor einer Stunde habe ich einen einflussreichen Politiker gesehen. Ein Journalist hat den heute Morgen um ein persönliches Gespräch gebeten.  
c. Vor einer Stunde hat ein Journalist einen einflussreichen Politiker gesehen. Er hat den heute Morgen um ein persönliches Gespräch gebeten.  
d. Vor einer Stunde hat ein Journalist einen einflussreichen Politiker gesehen. Der Journalist hat den heute Morgen um ein persönliches Gespräch gebeten.
- (22) a. Am Freitag habe ich am Flughafen zufällig einen bekannten Sänger getroffen. Ich habe den bereits auf vielen Konzerten gesehen.  
b. Am Freitag habe ich am Flughafen zufällig einen bekannten Sänger getroffen. Ein Mitschüler hat den bereits auf vielen Konzerten gesehen.  
c. Am Freitag hat ein Mitschüler am Flughafen zufällig einen bekannten Sänger getroffen. Er hat den bereits auf vielen Konzerten gesehen.  
d. Am Freitag hat ein Mitschüler am Flughafen zufällig einen bekannten Sänger getroffen. Der Mitschüler hat den bereits auf vielen Konzerten gesehen.
- (23) a. In den Sommerferien habe ich mit einem erfolgreichen Anwalt das Tauchen gelernt. Ich habe den schon in seiner Schulzeit kennengelernt.  
b. In den Sommerferien habe ich mit einem erfolgreichen Anwalt das Tauchen gelernt. Ein Kollege hat den schon in seiner Schulzeit kennengelernt.  
c. In den Sommerferien hat ein Kollege mit einem erfolgreichen Anwalt das Tauchen gelernt. Er hat den schon in seiner Schulzeit kennengelernt.  
d. In den Sommerferien hat ein Kollege mit einem erfolgreichen Anwalt das Tauchen gelernt. Der Kollege hat den schon in seiner Schulzeit kennengelernt.
- (24) a. Am Freitag habe ich einen ehemaligen Lehrer bei einem Fußballspiel getroffen. Ich habe den schon während der Schulzeit als fanatischen Fan erlebt.  
b. Am Freitag habe ich einen ehemaligen Lehrer bei einem Fußballspiel getroffen. Ein Klassenkamerad hat den schon während der Schulzeit als fanatischen Fan erlebt.  
c. Am Freitag hat ein Klassenkamerad einen ehemaligen Lehrer bei einem Fußballspiel getroffen. Er hat den schon während der Schulzeit als fanatischen Fan erlebt.  
d. Am Freitag hat ein Klassenkamerad einen ehemaligen Lehrer bei einem Fußballspiel getroffen. Der Klassenkamerad hat den schon während der Schulzeit als fanatischen Fan erlebt.
- (25) a. Am Wochenende habe ich zufälligerweise einen bekannten Schauspieler fotografieren können. Ich habe den gleich zu einem Pressegespräch eingeladen.  
b. Am Wochenende habe ich zufälligerweise einen bekannten Schauspieler fotografieren können. Ein Reporter hat den gleich zu einem Pressegespräch eingeladen.  
c. Am Wochenende hat ein Reporter zufälligerweise einen bekannten Schauspieler fotografieren können. Er hat den gleich zu einem Pressegespräch eingeladen.  
d. Am Wochenende hat ein Reporter zufälligerweise einen bekannten Schauspieler fotografieren können. Der Reporter hat den gleich zu einem Pressegespräch eingeladen.
- (26) a. Gestern Abend habe ich einen Vertrauten der Kanzlerin interviewt. Ich habe den schon mal auf einer Pressekonferenz getroffen.  
b. Gestern Abend habe ich einen Vertrauten der Kanzlerin interviewt. Ein Arbeits-

- kollege hat den schon mal auf einer Pressekonferenz getroffen.
- c. Gestern Abend hat ein Arbeitskollege einen Vertrauten der Kanzlerin interviewt. Er hat den schon mal auf einer Pressekonferenz getroffen.
- d. Gestern Abend hat ein Arbeitskollege einen Vertrauten der Kanzlerin interviewt. Der Arbeitskollege hat den schon mal auf einer Pressekonferenz getroffen.
- (27) a. Im Sommer habe ich einen in Frankreich lebenden Onkel eingeladen. Ich habe den erst vor kurzem ausfindig machen können.
- b. Im Sommer habe ich einen in Frankreich lebenden Onkel eingeladen. Ein Detektiv hat den erst vor kurzem ausfindig machen können.
- c. Im Sommer hat ein Detektiv einen in Frankreich lebenden Onkel eingeladen. Er hat den erst vor kurzem ausfindig machen können.
- d. Im Sommer hat ein Detektiv einen in Frankreich lebenden Onkel eingeladen. Der Detektiv hat den erst vor kurzem ausfindig machen können.
- (28) a. Gestern habe ich einen neuen Gast vorgestellt. Ich habe den als Berater ins Kloster eingeladen.
- b. Gestern habe ich einen neuen Gast vorgestellt. Ein Abt hat den als Berater ins Kloster eingeladen.
- c. Gestern hat ein Abt einen neuen Gast vorgestellt. Er hat den als Berater ins Kloster eingeladen.
- d. Gestern hat ein Abt einen neuen Gast vorgestellt. Der Abt hat den als Berater ins Kloster eingeladen.
- (29) a. Auf der Buchmesse habe ich mit einem erfahrenen Lektor gestritten. Ich habe den als Banausen und Kleingeist bezeichnet.
- b. Auf der Buchmesse habe ich mit einem erfahrenen Lektor gestritten. Ein Autor hat den als Banausen und Kleingeist bezeichnet.
- c. Auf der Buchmesse hat ein Autor mit einem erfahrenen Lektor gestritten. Er hat den als Banausen und Kleingeist bezeichnet.
- d. Auf der Buchmesse hat ein Autor mit einem erfahrenen Lektor gestritten. Der Autor hat den als Banausen und Kleingeist bezeichnet.
- (30) a. Vor ein paar Stunden habe ich gegen einen alternden Rivalen gespielt. Ich habe den in der Vergangenheit bereits vier Mal geschlagen.
- b. Vor ein paar Stunden habe ich gegen einen alternden Rivalen gespielt. Ein Teamkollege hat den in der Vergangenheit bereits vier Mal geschlagen.
- c. Vor ein paar Stunden hat ein Teamkollege gegen einen alternden Rivalen gespielt. Er hat den in der Vergangenheit bereits vier Mal geschlagen.
- d. Vor ein paar Stunden hat ein Teamkollege gegen einen alternden Rivalen gespielt. Der Teamkollege hat den in der Vergangenheit bereits vier Mal geschlagen.
- (31) a. Bei der Preisverleihung habe ich kurz mit einem ehemaligen Schüler gesprochen. Ich habe den damals besonders gefördert.
- b. Bei der Preisverleihung habe ich kurz mit einem ehemaligen Schüler gesprochen. Ein Referendar hat den damals besonders gefördert.
- c. Bei der Preisverleihung hat ein Referendar kurz mit einem ehemaligen Schüler gesprochen. Er hat den damals besonders gefördert.
- d. Bei der Preisverleihung hat ein Referendar kurz mit einem ehemaligen Schüler gesprochen. Der Referendar hat den damals besonders gefördert.
- (32) a. Den ganzen Sommer über habe ich mit einem begehrten Schlagzeuger eine Tour durch Europa gemacht. Ich habe den bereits als Live-Instrumentalisten angewor-

- ben.
- b. Den ganzen Sommer über habe ich mit einem begehrten Schlagzeuger eine Tour durch Europa gemacht. Ein Weltstar hat den bereits als Live-Instrumentalisten angeworben.
  - c. Den ganzen Sommer über hat ein Weltstar mit einem begehrten Schlagzeuger eine Tour durch Europa gemacht. Er hat den bereits als Live-Instrumentalisten angeworben.
  - d. Den ganzen Sommer über hat ein Weltstar mit einem begehrten Schlagzeuger eine Tour durch Europa gemacht. Der Weltstar hat den bereits als Live-Instrumentalisten angeworben.
- (33)
- a. Letzte Woche habe ich leider einen nervigen Azubi feuern müssen. Ich habe den beim Faulenzen erwischt.
  - b. Letzte Woche habe ich leider einen nervigen Azubi feuern müssen. Ein Mitarbeiter hat den beim Faulenzen erwischt.
  - c. Letzte Woche hat ein Mitarbeiter leider einen nervigen Azubi feuern müssen. Er hat den beim Faulenzen erwischt.
  - d. Letzte Woche hat ein Mitarbeiter leider einen nervigen Azubi feuern müssen. Der Mitarbeiter hat den beim Faulenzen erwischt.
- (34)
- a. Auf der Vernisage habe ich einen einflussreichen Galeristen begeistert. Ich habe den auf der Ausstellung mehrfach lobend erwähnt.
  - b. Auf der Vernisage habe ich einen einflussreichen Galeristen begeistert. Ein Künstler hat den auf der Ausstellung mehrfach lobend erwähnt.
  - c. Auf der Vernisage hat ein Künstler einen einflussreichen Galeristen begeistert. Er hat den auf der Ausstellung mehrfach lobend erwähnt.
  - d. Auf der Vernisage hat ein Künstler einen einflussreichen Galeristen begeistert. Der Künstler hat den auf der Ausstellung mehrfach lobend erwähnt.
- (35)
- a. Letzten Monat habe ich eine Bewährungsstrafe für einen schwierigen Klienten erwirkt. Ich habe den zu einer Entziehungskur bewegen können.
  - b. Letzten Monat habe ich eine Bewährungsstrafe für einen schwierigen Klienten erwirkt. Ein Richter hat den zu einer Entziehungskur bewegen können.
  - c. Letzten Monat hat ein Richter eine Bewährungsstrafe für einen schwierigen Klienten erwirkt. Er hat den zu einer Entziehungskur bewegen können.
  - d. Letzten Monat hat ein Richter eine Bewährungsstrafe für einen schwierigen Klienten erwirkt. Der Richter hat den zu einer Entziehungskur bewegen können.
- (36)
- a. Am Sonntag habe ich einen neu eingezogenen Hausbewohner besucht. Ich habe den zuvor telefonisch in unserer Wohnanlage begrüßt.
  - b. Am Sonntag habe ich einen neu eingezogenen Hausbewohner besucht. Ein Nachbar hat den zuvor telefonisch in unserer Wohnanlage begrüßt.
  - c. Am Sonntag hat ein Nachbar einen neu eingezogenen Hausbewohner besucht. Er hat den zuvor telefonisch in unserer Wohnanlage begrüßt.
  - d. Am Sonntag hat ein Nachbar einen neu eingezogenen Hausbewohner besucht. Der Nachbar hat den zuvor telefonisch in unserer Wohnanlage begrüßt.
- (37)
- a. Beim letzten Turnier habe ich einen aggressiven Teilnehmer der Arena verwiesen. Ich habe den zuvor mehrmals verwarnt.
  - b. Beim letzten Turnier habe ich einen aggressiven Teilnehmer der Arena verwiesen. Ein Kampfrichter hat den zuvor mehrmals verwarnt.
  - c. Beim letzten Turnier hat ein Kampfrichter einen aggressiven Teilnehmer der Arena verwiesen. Er hat den zuvor mehrmals verwarnt.

- d. Beim letzten Turnier hat ein Kampfrichter einen aggressiven Teilnehmer der Arena verwiesen. Der Kampfrichter hat den zuvor mehrmals verwarnt.
- (38) a. Nach meinem letzten Experiment habe ich einen weiteren Doktoranden eingestellt. Ich habe den vorher auf einer Konferenz um Kontaktdaten gebeten.  
b. Nach meinem letzten Experiment habe ich einen weiteren Doktoranden eingestellt. Ein Mitarbeiter hat den vorher auf einer Konferenz um Kontaktdaten gebeten.  
c. Nach meinem letzten Experiment hat ein Mitarbeiter einen weiteren Doktoranden eingestellt. Er hat den vorher auf einer Konferenz um Kontaktdaten gebeten.  
d. Nach meinem letzten Experiment hat ein Mitarbeiter einen weiteren Doktoranden eingestellt. Der Mitarbeiter hat den vorher auf einer Konferenz um Kontaktdaten gebeten.
- (39) a. Auf der Veranstaltung habe ich einen arroganten Pressesprecher beleidigt. Ich habe den im Vorfeld der Korruption bezichtigt.  
b. Auf der Veranstaltung habe ich einen arroganten Pressesprecher beleidigt. Ein Aktivist hat den im Vorfeld der Korruption bezichtigt.  
c. Auf der Veranstaltung hat ein Aktivist einen arroganten Pressesprecher beleidigt. Er hat den im Vorfeld der Korruption bezichtigt.  
d. Auf der Veranstaltung hat ein Aktivist einen arroganten Pressesprecher beleidigt. Der Aktivist hat den im Vorfeld der Korruption bezichtigt.
- (40) a. An Weihnachten habe ich meinen jüngsten Enkel reich beschenkt. Ich habe den beim Geschenkekauf im Jahr davor vergessen.  
b. An Weihnachten habe ich meinen jüngsten Enkel reich beschenkt. Ein Onkel hat den beim Geschenkekauf im Jahr davor vergessen.  
c. An Weihnachten hat ein Onkel meinen jüngsten Enkel reich beschenkt. Er hat den beim Geschenkekauf im Jahr davor vergessen.  
d. An Weihnachten hat ein Onkel meinen jüngsten Enkel reich beschenkt. Der Onkel hat den beim Geschenkekauf im Jahr davor vergessen.
