# Supplementary material for: Discourse and Form Constraints on Licensing Object-First Sentences in German
Source: MDPI journal article supplement (doi:10.3390/languages6020082), 2021-04-30
Supplement: s1 [file s1]

This file contains the materials of Experiment 1 of the main text (Bader & Portele, Discourse and Form Constraints on Licensing Object-first Sentences in German). For reasons of clarity, only the subject-object variant of each sentence is given. The five levels of the factor *Object* are listed as shown below:

- a. = personal pronoun
- b. = d-pronoun
- c. = definite NP
- d. = demonstrative pronoun
- e. = demonstrative NP

- 
- (1) a. Im Urlaub hat der Wissenschaftler einen befreundeten Kollegen getroffen. Er hat ihn während einer Grillparty für ein gemeinsames Projekt gewinnen können.  
 b. Im Urlaub hat der Wissenschaftler einen befreundeten Kollegen getroffen. Er hat den während einer Grillparty für ein gemeinsames Projekt gewinnen können.  
 c. Im Urlaub hat der Wissenschaftler einen befreundeten Kollegen getroffen. Er hat den Kollegen während einer Grillparty für ein gemeinsames Projekt gewinnen können.  
 d. Im Urlaub hat der Wissenschaftler einen befreundeten Kollegen getroffen. Er hat diesen während einer Grillparty für ein gemeinsames Projekt gewinnen können.  
 e. Im Urlaub hat der Wissenschaftler einen befreundeten Kollegen getroffen. Er hat diesen Kollegen während einer Grillparty für ein gemeinsames Projekt gewinnen können.
- (2) a. Gestern hat der Sportler ganz überraschend einen alten Freund getroffen. Er hat ihn gleich zu einem Bier eingeladen.  
 b. Gestern hat der Sportler ganz überraschend einen alten Freund getroffen. Er hat den gleich zu einem Bier eingeladen.  
 c. Gestern hat der Sportler ganz überraschend einen alten Freund getroffen. Er hat den Freund gleich zu einem Bier eingeladen.  
 d. Gestern hat der Sportler ganz überraschend einen alten Freund getroffen. Er hat diesen gleich zu einem Bier eingeladen.  
 e. Gestern hat der Sportler ganz überraschend einen alten Freund getroffen. Er hat diesen Freund gleich zu einem Bier eingeladen.
- (3) a. Heute morgen hat der Firmensprecher einen wichtigen Kunden angerufen. Er hat ihn von dem neuen Produkt überzeugt.  
 b. Heute morgen hat der Firmensprecher einen wichtigen Kunden angerufen. Er hat den von dem neuen Produkt überzeugt.  
 c. Heute morgen hat der Firmensprecher einen wichtigen Kunden angerufen. Er hat den Kunden von dem neuen Produkt überzeugt.  
 d. Heute morgen hat der Firmensprecher einen wichtigen Kunden angerufen. Er hat diesen von dem neuen Produkt überzeugt.  
 e. Heute morgen hat der Firmensprecher einen wichtigen Kunden angerufen. Er hat diesen Kunden von dem neuen Produkt überzeugt.

- (4)
- a. Vor ein paar Wochen hat der Chef endlich einen kompetenten Sachbearbeiter gefunden. Er hat ihn seitdem schon häufiger mal befragt.
  - b. Vor ein paar Wochen hat der Chef endlich einen kompetenten Sachbearbeiter gefunden. Er hat den seitdem schon häufiger mal befragt.
  - c. Vor ein paar Wochen hat der Chef endlich einen kompetenten Sachbearbeiter gefunden. Er hat den Sachbearbeiter seitdem schon häufiger mal befragt.
  - d. Vor ein paar Wochen hat der Chef endlich einen kompetenten Sachbearbeiter gefunden. Er hat diesen seitdem schon häufiger mal befragt.
  - e. Vor ein paar Wochen hat der Chef endlich einen kompetenten Sachbearbeiter gefunden. Er hat diesen Sachbearbeiter seitdem schon häufiger mal befragt.
- (5)
- a. Letzte Woche hat der Sponsor mit einem Spieler aus der ersten Mannschaft telefoniert. Er hat ihn zu einer Verlängerung seines Vertrages bewegt.
  - b. Letzte Woche hat der Sponsor mit einem Spieler aus der ersten Mannschaft telefoniert. Er hat den zu einer Verlängerung seines Vertrages bewegt.
  - c. Letzte Woche hat der Sponsor mit einem Spieler aus der ersten Mannschaft telefoniert. Er hat den Spieler zu einer Verlängerung seines Vertrages bewegt.
  - d. Letzte Woche hat der Sponsor mit einem Spieler aus der ersten Mannschaft telefoniert. Er hat diesen zu einer Verlängerung seines Vertrages bewegt.
  - e. Letzte Woche hat der Sponsor mit einem Spieler aus der ersten Mannschaft telefoniert. Er hat diesen Spieler zu einer Verlängerung seines Vertrages bewegt.
- (6)
- a. Gestern musste der Vereinspräsident gegen einen ziemlich bekannten Schachspieler antreten. Er hat ihn nur mit sehr viel Glück besiegt.
  - b. Gestern musste der Vereinspräsident gegen einen ziemlich bekannten Schachspieler antreten. Er hat den nur mit sehr viel Glück besiegt.
  - c. Gestern musste der Vereinspräsident gegen einen ziemlich bekannten Schachspieler antreten. Er hat den Schachspieler nur mit sehr viel Glück besiegt.
  - d. Gestern musste der Vereinspräsident gegen einen ziemlich bekannten Schachspieler antreten. Er hat diesen nur mit sehr viel Glück besiegt.
  - e. Gestern musste der Vereinspräsident gegen einen ziemlich bekannten Schachspieler antreten. Er hat diesen Schachspieler nur mit sehr viel Glück besiegt.
- (7)
- a. Vor einigen Wochen musste der Meister sich intensiv um einen etwas schwierigen Lehrling kümmern. Er hat ihn für die Prüfungen fit gemacht.
  - b. Vor einigen Wochen musste der Meister sich intensiv um einen etwas schwierigen Lehrling kümmern. Er hat den für die Prüfungen fit gemacht.
  - c. Vor einigen Wochen musste der Meister sich intensiv um einen etwas schwierigen Lehrling kümmern. Er hat den Lehrling für die Prüfungen fit gemacht.
  - d. Vor einigen Wochen musste der Meister sich intensiv um einen etwas schwierigen Lehrling kümmern. Er hat diesen für die Prüfungen fit gemacht.
  - e. Vor einigen Wochen musste der Meister sich intensiv um einen etwas schwierigen Lehrling kümmern. Er hat diesen Lehrling für die Prüfungen fit gemacht.
- (8)
- a. Gestern musste der Agent über eine Stunde lang mit einem Manager aus den USA verhandeln. Er hat ihn leider nur sehr schlecht verstanden.
  - b. Gestern musste der Agent über eine Stunde lang mit einem Manager aus den USA verhandeln. Er hat den leider nur sehr schlecht verstanden.
  - c. Gestern musste der Agent über eine Stunde lang mit einem Manager aus den USA verhandeln. Er hat den Manager leider nur sehr schlecht verstanden.
  - d. Gestern musste der Agent über eine Stunde lang mit einem Manager aus den USA verhandeln. Er hat diesen leider nur sehr schlecht verstanden.

- e. Gestern musste der Agent über eine Stunde lang mit einem Manager aus den USA verhandeln. Er hat diesen Manager leider nur sehr schlecht verstanden.
- (9)
- a. Einen ganzen Vormittag lang hat der Abteilungsleiter vergeblich auf einen vermögenden Geschäftspartner gewartet. Er hat ihn seitdem nicht wieder kontaktiert.
  - b. Einen ganzen Vormittag lang hat der Abteilungsleiter vergeblich auf einen vermögenden Geschäftspartner gewartet. Er hat den seitdem nicht wieder kontaktiert.
  - c. Einen ganzen Vormittag lang hat der Abteilungsleiter vergeblich auf einen vermögenden Geschäftspartner gewartet. Er hat den Geschäftspartner seitdem nicht wieder kontaktiert.
  - d. Einen ganzen Vormittag lang hat der Abteilungsleiter vergeblich auf einen vermögenden Geschäftspartner gewartet. Er hat diesen seitdem nicht wieder kontaktiert.
  - e. Einen ganzen Vormittag lang hat der Abteilungsleiter vergeblich auf einen vermögenden Geschäftspartner gewartet. Er hat diesen Geschäftspartner seitdem nicht wieder kontaktiert.
- (10)
- a. Heute Morgen ist der berühmte Journalist auf einen einflussreichen Staatssekretär getroffen. Er hat ihn mit kritischen Fragen auf die Probe gestellt.
  - b. Heute Morgen ist der berühmte Journalist auf einen einflussreichen Staatssekretär getroffen. Er hat den mit kritischen Fragen auf die Probe gestellt.
  - c. Heute Morgen ist der berühmte Journalist auf einen einflussreichen Staatssekretär getroffen. Er hat den Staatssekretär mit kritischen Fragen auf die Probe gestellt.
  - d. Heute Morgen ist der berühmte Journalist auf einen einflussreichen Staatssekretär getroffen. Er hat diesen mit kritischen Fragen auf die Probe gestellt.
  - e. Heute Morgen ist der berühmte Journalist auf einen einflussreichen Staatssekretär getroffen. Er hat diesen Staatssekretär mit kritischen Fragen auf die Probe gestellt.
- (11)
- a. Am Wochenende hat der Inspektor bei einem zwielichtigen Nachbarn geklingelt. Er hat ihn völlig zu Recht aufs Revier mitgenommen.
  - b. Am Wochenende hat der Inspektor bei einem zwielichtigen Nachbarn geklingelt. Er hat den völlig zu Recht aufs Revier mitgenommen.
  - c. Am Wochenende hat der Inspektor bei einem zwielichtigen Nachbarn geklingelt. Er hat den Nachbarn völlig zu Recht aufs Revier mitgenommen.
  - d. Am Wochenende hat der Inspektor bei einem zwielichtigen Nachbarn geklingelt. Er hat diesen völlig zu Recht aufs Revier mitgenommen.
  - e. Am Wochenende hat der Inspektor bei einem zwielichtigen Nachbarn geklingelt. Er hat diesen Nachbarn völlig zu Recht aufs Revier mitgenommen.
- (12)
- a. Vor fünf Minuten hat der Lokführer mit einem erfahrenen Zugbegleiter gesprochen. Er hat ihn vor den Hooligans im letzten Abteil warnen müssen.
  - b. Vor fünf Minuten hat der Lokführer mit einem erfahrenen Zugbegleiter gesprochen. Er hat den vor den Hooligans im letzten Abteil warnen müssen.
  - c. Vor fünf Minuten hat der Lokführer mit einem erfahrenen Zugbegleiter gesprochen. Er hat den Zugbegleiter vor den Hooligans im letzten Abteil warnen müssen.
  - d. Vor fünf Minuten hat der Lokführer mit einem erfahrenen Zugbegleiter gesprochen. Er hat diesen vor den Hooligans im letzten Abteil warnen müssen.
  - e. Vor fünf Minuten hat der Lokführer mit einem erfahrenen Zugbegleiter gesprochen. Er hat diesen Zugbegleiter vor den Hooligans im letzten Abteil warnen müssen.
- (13)
- a. Bei seinem stündlichen Rundgang hat der Sicherheitsmann plötzlich einen bedrohlich wirkenden Einbrecher entdeckt. Er hat ihn glücklicherweise vertreiben

- können.
- b. Bei seinem stündlichen Rundgang hat der Sicherheitsmann plötzlich einen bedrohlich wirkenden Einbrecher entdeckt. Er hat den glücklicherweise vertreiben können.
  - c. Bei seinem stündlichen Rundgang hat der Sicherheitsmann plötzlich einen bedrohlich wirkenden Einbrecher entdeckt. Er hat den Einbrecher glücklicherweise vertreiben können.
  - d. Bei seinem stündlichen Rundgang hat der Sicherheitsmann plötzlich einen bedrohlich wirkenden Einbrecher entdeckt. Er hat diesen glücklicherweise vertreiben können.
  - e. Bei seinem stündlichen Rundgang hat der Sicherheitsmann plötzlich einen bedrohlich wirkenden Einbrecher entdeckt. Er hat diesen Einbrecher glücklicherweise vertreiben können.
- (14)
- a. Während des Abwaschs hat der Versicherungsvertreter einen vielbeschäftigten Hausmann gestört. Er hat ihn trotz des vielen Geschirrs in ein Gespräch verwickelt.
  - b. Während des Abwaschs hat der Versicherungsvertreter einen vielbeschäftigten Hausmann gestört. Er hat den trotz des vielen Geschirrs in ein Gespräch verwickelt.
  - c. Während des Abwaschs hat der Versicherungsvertreter einen vielbeschäftigten Hausmann gestört. Er hat den Hausmann trotz des vielen Geschirrs in ein Gespräch verwickelt.
  - d. Während des Abwaschs hat der Versicherungsvertreter einen vielbeschäftigten Hausmann gestört. Er hat diesen trotz des vielen Geschirrs in ein Gespräch verwickelt.
  - e. Während des Abwaschs hat der Versicherungsvertreter einen vielbeschäftigten Hausmann gestört. Er hat diesen Hausmann trotz des vielen Geschirrs in ein Gespräch verwickelt.
- (15)
- a. Mitten in der Nacht hat der Stationsarzt durch Zufall einen verwirrten Patienten auf dem Dach entdeckt. Er hat ihn zum Glück problemlos wieder heruntergebracht.
  - b. Mitten in der Nacht hat der Stationsarzt durch Zufall einen verwirrten Patienten auf dem Dach entdeckt. Er hat den zum Glück problemlos wieder heruntergebracht.
  - c. Mitten in der Nacht hat der Stationsarzt durch Zufall einen verwirrten Patienten auf dem Dach entdeckt. Er hat den Patienten zum Glück problemlos wieder heruntergebracht.
  - d. Mitten in der Nacht hat der Stationsarzt durch Zufall einen verwirrten Patienten auf dem Dach entdeckt. Er hat diesen zum Glück problemlos wieder heruntergebracht.
  - e. Mitten in der Nacht hat der Stationsarzt durch Zufall einen verwirrten Patienten auf dem Dach entdeckt. Er hat diesen Patienten zum Glück problemlos wieder heruntergebracht.
- (16)
- a. Letzten Herbst hat der lokale Apfelbauer einen betrunkenen Jugendlichen auf seinem Feld erwischt. Er hat ihn aus dem Affekt heraus des Diebstahls beschuldigt.
  - b. Letzten Herbst hat der lokale Apfelbauer einen betrunkenen Jugendlichen auf seinem Feld erwischt. Er hat den aus dem Affekt heraus des Diebstahls beschuldigt.
  - c. Letzten Herbst hat der lokale Apfelbauer einen betrunkenen Jugendlichen auf sei-

- nem Feld erwischt. Er hat den Jugendlichen aus dem Affekt heraus des Diebstahls beschuldigt.
- d. Letzten Herbst hat der lokale Apfelbauer einen betrunkenen Jugendlichen auf seinem Feld erwischt. Er hat diesen aus dem Affekt heraus des Diebstahls beschuldigt.
- e. Letzten Herbst hat der lokale Apfelbauer einen betrunkenen Jugendlichen auf seinem Feld erwischt. Er hat diesen Jugendlichen aus dem Affekt heraus des Diebstahls beschuldigt.
- (17) a. Im letzten Quartal hat sich der Geschäftsleiter zum Verhandeln mit einem aufstrebenden Konkurrenten getroffen. Er hat ihn zu einer gesetzeswidrigen Kartellbildung überreden wollen.
- b. Im letzten Quartal hat sich der Geschäftsleiter zum Verhandeln mit einem aufstrebenden Konkurrenten getroffen. Er hat den zu einer gesetzeswidrigen Kartellbildung überreden wollen.
- c. Im letzten Quartal hat sich der Geschäftsleiter zum Verhandeln mit einem aufstrebenden Konkurrenten getroffen. Er hat den Konkurrenten zu einer gesetzeswidrigen Kartellbildung überreden wollen.
- d. Im letzten Quartal hat sich der Geschäftsleiter zum Verhandeln mit einem aufstrebenden Konkurrenten getroffen. Er hat diesen zu einer gesetzeswidrigen Kartellbildung überreden wollen.
- e. Im letzten Quartal hat sich der Geschäftsleiter zum Verhandeln mit einem aufstrebenden Konkurrenten getroffen. Er hat diesen Konkurrenten zu einer gesetzeswidrigen Kartellbildung überreden wollen.
- (18) a. Im vergangenen Semester hat der Professor einem verzweifelten Studenten einen Fachrichtungswechsel empfohlen. Er hat ihn seitdem nie wiedergesehen.
- b. Im vergangenen Semester hat der Professor einem verzweifelten Studenten einen Fachrichtungswechsel empfohlen. Er hat den seitdem nie wiedergesehen.
- c. Im vergangenen Semester hat der Professor einem verzweifelten Studenten einen Fachrichtungswechsel empfohlen. Er hat den Studenten seitdem nie wiedergesehen.
- d. Im vergangenen Semester hat der Professor einem verzweifelten Studenten einen Fachrichtungswechsel empfohlen. Er hat diesen seitdem nie wiedergesehen.
- e. Im vergangenen Semester hat der Professor einem verzweifelten Studenten einen Fachrichtungswechsel empfohlen. Er hat diesen Studenten seitdem nie wiedergesehen.
- (19) a. Vor vielen Jahren hat der Offizier einem langjährigen Freund seine Uniform geschenkt. Er hat ihn zu einem Eintritt in die Armee ermutigt.
- b. Vor vielen Jahren hat der Offizier einem langjährigen Freund seine Uniform geschenkt. Er hat den zu einem Eintritt in die Armee ermutigt.
- c. Vor vielen Jahren hat der Offizier einem langjährigen Freund seine Uniform geschenkt. Er hat den Freund zu einem Eintritt in die Armee ermutigt.
- d. Vor vielen Jahren hat der Offizier einem langjährigen Freund seine Uniform geschenkt. Er hat diesen zu einem Eintritt in die Armee ermutigt.
- e. Vor vielen Jahren hat der Offizier einem langjährigen Freund seine Uniform geschenkt. Er hat diesen Freund zu einem Eintritt in die Armee ermutigt.
- (20) a. Gerade eben ist der Pfleger von der Frühchenstation bei einem aufgeregten Vater gewesen. Er hat ihn von der Krankheit des Kindes unterrichten müssen.
- b. Gerade eben ist der Pfleger von der Frühchenstation bei einem aufgeregten Vater

- gewesen. Er hat den von der Krankheit des Kindes unterrichten müssen.
- c. Gerade eben ist der Pfleger von der Frühchenstation bei einem aufgeregten Vater gewesen. Er hat den Vater von der Krankheit des Kindes unterrichten müssen.
- d. Gerade eben ist der Pfleger von der Frühchenstation bei einem aufgeregten Vater gewesen. Er hat diesen von der Krankheit des Kindes unterrichten müssen.
- e. Gerade eben ist der Pfleger von der Frühchenstation bei einem aufgeregten Vater gewesen. Er hat diesen Vater von der Krankheit des Kindes unterrichten müssen.
- (21) a. Vor einer Stunde hat der Journalist mit einem einflussreichen Politiker gesprochen. Er hatte ihn schon vor ewigen Zeiten um ein persönliches Gespräch gebeten.
- b. Vor einer Stunde hat der Journalist mit einem einflussreichen Politiker gesprochen. Er hatte den schon vor ewigen Zeiten um ein persönliches Gespräch gebeten.
- c. Vor einer Stunde hat der Journalist mit einem einflussreichen Politiker gesprochen. Er hatte den Politiker schon vor ewigen Zeiten um ein persönliches Gespräch gebeten.
- d. Vor einer Stunde hat der Journalist mit einem einflussreichen Politiker gesprochen. Er hatte diesen schon vor ewigen Zeiten um ein persönliches Gespräch gebeten.
- e. Vor einer Stunde hat der Journalist mit einem einflussreichen Politiker gesprochen. Er hatte diesen Politiker schon vor ewigen Zeiten um ein persönliches Gespräch gebeten.
- (22) a. Am Freitag hat der Familienvater am Flughafen einen entfernten Verwandten abholen müssen. Er hatte ihn bestimmt zwanzig Jahre lang nicht gesehen.
- b. Am Freitag hat der Familienvater am Flughafen einen entfernten Verwandten abholen müssen. Er hatte den bestimmt zwanzig Jahre lang nicht gesehen.
- c. Am Freitag hat der Familienvater am Flughafen einen entfernten Verwandten abholen müssen. Er hatte den Verwandten bestimmt zwanzig Jahre lang nicht gesehen.
- d. Am Freitag hat der Familienvater am Flughafen einen entfernten Verwandten abholen müssen. Er hatte diesen bestimmt zwanzig Jahre lang nicht gesehen.
- e. Am Freitag hat der Familienvater am Flughafen einen entfernten Verwandten abholen müssen. Er hatte diesen Verwandten bestimmt zwanzig Jahre lang nicht gesehen.
- (23) a. In den Sommerferien ist der Nachbar mit einem guten Bekannten tauchen gegangen. Er hatte ihn schon in seiner Schulzeit kennengelernt.
- b. In den Sommerferien ist der Nachbar mit einem guten Bekannten tauchen gegangen. Er hatte den schon in seiner Schulzeit kennengelernt.
- c. In den Sommerferien ist der Nachbar mit einem guten Bekannten tauchen gegangen. Er hatte den Bekannten schon in seiner Schulzeit kennengelernt.
- d. In den Sommerferien ist der Nachbar mit einem guten Bekannten tauchen gegangen. Er hatte diesen schon in seiner Schulzeit kennengelernt.
- e. In den Sommerferien ist der Nachbar mit einem guten Bekannten tauchen gegangen. Er hatte diesen Bekannten schon in seiner Schulzeit kennengelernt.
- (24) a. Am Freitag ist der Schüler zusammen mit einem ehemaligen Lehrer bei einem Fußballspiel gewesen. Er hatte ihn schon während der Schulzeit als fanatischen Fan kennengelernt.
- b. Am Freitag ist der Schüler zusammen mit einem ehemaligen Lehrer bei einem Fußballspiel gewesen. Er hatte den schon während der Schulzeit als fanatischen

- Fan kennengelernt.
- c. Am Freitag ist der Schüler zusammen mit einem ehemaligen Lehrer bei einem Fußballspiel gewesen. Er hatte den Lehrer schon während der Schulzeit als fanatischen Fan kennengelernt.
  - d. Am Freitag ist der Schüler zusammen mit einem ehemaligen Lehrer bei einem Fußballspiel gewesen. Er hatte diesen schon während der Schulzeit als fanatischen Fan kennengelernt.
  - e. Am Freitag ist der Schüler zusammen mit einem ehemaligen Lehrer bei einem Fußballspiel gewesen. Er hatte diesen Lehrer schon während der Schulzeit als fanatischen Fan kennengelernt.
- (25)
- a. Am Wochenende hat der Klatschreporter zufälligerweise einen bekannten Schauspieler fotografieren können. Er hatte ihn schon in sehr vielen Filmen gesehen.
  - b. Am Wochenende hat der Klatschreporter zufälligerweise einen bekannten Schauspieler fotografieren können. Er hatte den schon in sehr vielen Filmen gesehen.
  - c. Am Wochenende hat der Klatschreporter zufälligerweise einen bekannten Schauspieler fotografieren können. Er hatte den Schauspieler schon in sehr vielen Filmen gesehen.
  - d. Am Wochenende hat der Klatschreporter zufälligerweise einen bekannten Schauspieler fotografieren können. Er hatte diesen schon in sehr vielen Filmen gesehen.
  - e. Am Wochenende hat der Klatschreporter zufälligerweise einen bekannten Schauspieler fotografieren können. Er hatte diesen Schauspieler schon in sehr vielen Filmen gesehen.
- (26)
- a. Gestern Abend hat der Nachrichtensprecher einen Vertrauten der Kanzlerin interviewt. Er hatte ihn schon mal auf einer Pressekonferenz getroffen.
  - b. Gestern Abend hat der Nachrichtensprecher einen Vertrauten der Kanzlerin interviewt. Er hatte den schon mal auf einer Pressekonferenz getroffen.
  - c. Gestern Abend hat der Nachrichtensprecher einen Vertrauten der Kanzlerin interviewt. Er hatte den Vertrauten schon mal auf einer Pressekonferenz getroffen.
  - d. Gestern Abend hat der Nachrichtensprecher einen Vertrauten der Kanzlerin interviewt. Er hatte diesen schon mal auf einer Pressekonferenz getroffen.
  - e. Gestern Abend hat der Nachrichtensprecher einen Vertrauten der Kanzlerin interviewt. Er hatte diesen Vertrauten schon mal auf einer Pressekonferenz getroffen.
- (27)
- a. Im Sommer hat der junge Mann einen in Frankreich lebenden Onkel eingeladen. Er hatte ihn erst vor kurzem ausfindig machen können.
  - b. Im Sommer hat der junge Mann einen in Frankreich lebenden Onkel eingeladen. Er hatte den erst vor kurzem ausfindig machen können.
  - c. Im Sommer hat der junge Mann einen in Frankreich lebenden Onkel eingeladen. Er hatte den Onkel erst vor kurzem ausfindig machen können.
  - d. Im Sommer hat der junge Mann einen in Frankreich lebenden Onkel eingeladen. Er hatte diesen erst vor kurzem ausfindig machen können.
  - e. Im Sommer hat der junge Mann einen in Frankreich lebenden Onkel eingeladen. Er hatte diesen Onkel erst vor kurzem ausfindig machen können.
- (28)
- a. Gestern hat der Abt des Klosters einen neuen Gast vorgestellt. Er hatte ihn als Berater ins Kloster eingeladen.
  - b. Gestern hat der Abt des Klosters einen neuen Gast vorgestellt. Er hatte den als Berater ins Kloster eingeladen.
  - c. Gestern hat der Abt des Klosters einen neuen Gast vorgestellt. Er hatte den Gast als Berater ins Kloster eingeladen.

- d. Gestern hat der Abt des Klosters einen neuen Gast vorgestellt. Er hatte diesen als Berater ins Kloster eingeladen.
- e. Gestern hat der Abt des Klosters einen neuen Gast vorgestellt. Er hatte diesen Gast als Berater ins Kloster eingeladen.
- (29) a. Letztes Jahr hat der Bestsellerautor sich mit einem erfahrenen Lektor zerstritten. Er hatte ihn als Banausen und Kleingeist bezeichnet.
- b. Letztes Jahr hat der Bestsellerautor sich mit einem erfahrenen Lektor zerstritten. Er hatte den als Banausen und Kleingeist bezeichnet.
- c. Letztes Jahr hat der Bestsellerautor sich mit einem erfahrenen Lektor zerstritten. Er hatte den Lektor als Banausen und Kleingeist bezeichnet.
- d. Letztes Jahr hat der Bestsellerautor sich mit einem erfahrenen Lektor zerstritten. Er hatte diesen als Banausen und Kleingeist bezeichnet.
- e. Letztes Jahr hat der Bestsellerautor sich mit einem erfahrenen Lektor zerstritten. Er hatte diesen Lektor als Banausen und Kleingeist bezeichnet.
- (30) a. Vor ein paar Stunden hat der amtierende Weltmeister gegen einen alternden Rivalen gespielt. Er hatte ihn in der Vergangenheit bereits vier Mal vernichtend geschlagen.
- b. Vor ein paar Stunden hat der amtierende Weltmeister gegen einen alternden Rivalen gespielt. Er hatte den in der Vergangenheit bereits vier Mal vernichtend geschlagen.
- c. Vor ein paar Stunden hat der amtierende Weltmeister gegen einen alternden Rivalen gespielt. Er hatte den Rivalen in der Vergangenheit bereits vier Mal vernichtend geschlagen.
- d. Vor ein paar Stunden hat der amtierende Weltmeister gegen einen alternden Rivalen gespielt. Er hatte diesen in der Vergangenheit bereits vier Mal vernichtend geschlagen.
- e. Vor ein paar Stunden hat der amtierende Weltmeister gegen einen alternden Rivalen gespielt. Er hatte diesen Rivalen in der Vergangenheit bereits vier Mal vernichtend geschlagen.
- (31) a. Heute Mittag hat der Lehrer noch mit einem ehemaligen Schüler gesprochen. Er hatte ihn damals besonders gefördert.
- b. Heute Mittag hat der Lehrer noch mit einem ehemaligen Schüler gesprochen. Er hatte den damals besonders gefördert.
- c. Heute Mittag hat der Lehrer noch mit einem ehemaligen Schüler gesprochen. Er hatte den Schüler damals besonders gefördert.
- d. Heute Mittag hat der Lehrer noch mit einem ehemaligen Schüler gesprochen. Er hatte diesen damals besonders gefördert.
- e. Heute Mittag hat der Lehrer noch mit einem ehemaligen Schüler gesprochen. Er hatte diesen Schüler damals besonders gefördert.
- (32) a. Den ganzen Sommer über hat der Sänger mit einem sehr begehrten Schlagzeuger eine Tour durch Europa gemacht. Er hatte ihn als seinen Live-Instrumentalisten angeworben.
- b. Den ganzen Sommer über hat der Sänger mit einem sehr begehrten Schlagzeuger eine Tour durch Europa gemacht. Er hatte den als seinen Live-Instrumentalisten angeworben.
- c. Den ganzen Sommer über hat der Sänger mit einem sehr begehrten Schlagzeuger eine Tour durch Europa gemacht. Er hatte den Schlagzeuger als seinen Live-Instrumentalisten angeworben.



- d. Den ganzen Sommer über hat der Sänger mit einem sehr begehrten Schlagzeuger eine Tour durch Europa gemacht. Er hatte diesen als seinen Live-Instrumentalisten angeworben.
  - e. Den ganzen Sommer über hat der Sänger mit einem sehr begehrten Schlagzeuger eine Tour durch Europa gemacht. Er hatte diesen Schlagzeuger als seinen Live-Instrumentalisten angeworben.
- (33)
- a. Letzte Woche hat der Chef endlich einen nervigen Kollegen gefeuert. Er hatte ihn beim Faulenzen erwischt.
  - b. Letzte Woche hat der Chef endlich einen nervigen Kollegen gefeuert. Er hatte den beim Faulenzen erwischt.
  - c. Letzte Woche hat der Chef endlich einen nervigen Kollegen gefeuert. Er hatte den Kollegen beim Faulenzen erwischt.
  - d. Letzte Woche hat der Chef endlich einen nervigen Kollegen gefeuert. Er hatte diesen beim Faulenzen erwischt.
  - e. Letzte Woche hat der Chef endlich einen nervigen Kollegen gefeuert. Er hatte diesen Kollegen beim Faulenzen erwischt.
- (34)
- a. Vor knapp einem Jahr ist der Künstler mit seinem neuen Partner zusammengekommen. Er hatte ihn auf einer Ausstellung kennengelernt.
  - b. Vor knapp einem Jahr ist der Künstler mit seinem neuen Partner zusammengekommen. Er hatte den auf einer Ausstellung kennengelernt.
  - c. Vor knapp einem Jahr ist der Künstler mit seinem neuen Partner zusammengekommen. Er hatte den Partner auf einer Ausstellung kennengelernt.
  - d. Vor knapp einem Jahr ist der Künstler mit seinem neuen Partner zusammengekommen. Er hatte diesen auf einer Ausstellung kennengelernt.
  - e. Vor knapp einem Jahr ist der Künstler mit seinem neuen Partner zusammengekommen. Er hatte diesen Partner auf einer Ausstellung kennengelernt.
- (35)
- a. Letzten Monat hat der Verteidiger einen Freispruch für seinen schwierigsten Klienten erwirkt. Er hatte ihn schon früher mehrfach vertreten.
  - b. Letzten Monat hat der Verteidiger einen Freispruch für seinen schwierigsten Klienten erwirkt. Er hatte den schon früher mehrfach vertreten.
  - c. Letzten Monat hat der Verteidiger einen Freispruch für seinen schwierigsten Klienten erwirkt. Er hatte den Klienten schon früher mehrfach vertreten.
  - d. Letzten Monat hat der Verteidiger einen Freispruch für seinen schwierigsten Klienten erwirkt. Er hatte diesen schon früher mehrfach vertreten.
  - e. Letzten Monat hat der Verteidiger einen Freispruch für seinen schwierigsten Klienten erwirkt. Er hatte diesen Klienten schon früher mehrfach vertreten.
- (36)
- a. Am Sonntag hat der Bürgermeister einen neu zugezogenen Bürger besucht. Er hatte ihn zuvor telefonisch in der Stadt begrüßt.
  - b. Am Sonntag hat der Bürgermeister einen neu zugezogenen Bürger besucht. Er hatte den zuvor telefonisch in der Stadt begrüßt.
  - c. Am Sonntag hat der Bürgermeister einen neu zugezogenen Bürger besucht. Er hatte den Bürger zuvor telefonisch in der Stadt begrüßt.
  - d. Am Sonntag hat der Bürgermeister einen neu zugezogenen Bürger besucht. Er hatte diesen zuvor telefonisch in der Stadt begrüßt.
  - e. Am Sonntag hat der Bürgermeister einen neu zugezogenen Bürger besucht. Er hatte diesen Bürger zuvor telefonisch in der Stadt begrüßt.
- (37)
- a. Beim letzten Turnier hat der Kampfrichter einen aggressiven Teilnehmer der Arena verwiesen. Er hatte ihn bereits verwarnt.

- b. Beim letzten Turnier hat der Kampfrichter einen aggressiven Teilnehmer der Arena verwiesen. Er hatte den bereits verwarnt.
  - c. Beim letzten Turnier hat der Kampfrichter einen aggressiven Teilnehmer der Arena verwiesen. Er hatte den Teilnehmer bereits verwarnt.
  - d. Beim letzten Turnier hat der Kampfrichter einen aggressiven Teilnehmer der Arena verwiesen. Er hatte diesen bereits verwarnt.
  - e. Beim letzten Turnier hat der Kampfrichter einen aggressiven Teilnehmer der Arena verwiesen. Er hatte diesen Teilnehmer bereits verwarnt.
- (38)
- a. Nach seinem letzten Experiment hat der Forscher einen promovierten Assistenten eingestellt. Er hatte ihn vorher auf einer Konferenz um Kontaktdaten gebeten.
  - b. Nach seinem letzten Experiment hat der Forscher einen promovierten Assistenten eingestellt. Er hatte den vorher auf einer Konferenz um Kontaktdaten gebeten.
  - c. Nach seinem letzten Experiment hat der Forscher einen promovierten Assistenten eingestellt. Er hatte den Assistenten vorher auf einer Konferenz um Kontaktdaten gebeten.
  - d. Nach seinem letzten Experiment hat der Forscher einen promovierten Assistenten eingestellt. Er hatte diesen vorher auf einer Konferenz um Kontaktdaten gebeten.
  - e. Nach seinem letzten Experiment hat der Forscher einen promovierten Assistenten eingestellt. Er hatte diesen Assistenten vorher auf einer Konferenz um Kontaktdaten gebeten.
- (39)
- a. Auf der Veranstaltung hat der Aktivist einen arroganten Pressesprecher beleidigt. Er hatte ihn im Vorfeld der Korruption bezichtigt.
  - b. Auf der Veranstaltung hat der Aktivist einen arroganten Pressesprecher beleidigt. Er hatte den im Vorfeld der Korruption bezichtigt.
  - c. Auf der Veranstaltung hat der Aktivist einen arroganten Pressesprecher beleidigt. Er hatte den Pressesprecher im Vorfeld der Korruption bezichtigt.
  - d. Auf der Veranstaltung hat der Aktivist einen arroganten Pressesprecher beleidigt. Er hatte diesen im Vorfeld der Korruption bezichtigt.
  - e. Auf der Veranstaltung hat der Aktivist einen arroganten Pressesprecher beleidigt. Er hatte diesen Pressesprecher im Vorfeld der Korruption bezichtigt.
- (40)
- a. An Weihnachten hat der Großvater seinen jüngsten Enkel reich beschenkt. Er hatte ihn beim Geschenkekauf im Jahr davor vergessen.
  - b. An Weihnachten hat der Großvater seinen jüngsten Enkel reich beschenkt. Er hatte den beim Geschenkekauf im Jahr davor vergessen.
  - c. An Weihnachten hat der Großvater seinen jüngsten Enkel reich beschenkt. Er hatte den Enkel beim Geschenkekauf im Jahr davor vergessen.
  - d. An Weihnachten hat der Großvater seinen jüngsten Enkel reich beschenkt. Er hatte diesen beim Geschenkekauf im Jahr davor vergessen.
  - e. An Weihnachten hat der Großvater seinen jüngsten Enkel reich beschenkt. Er hatte diesen Enkel beim Geschenkekauf im Jahr davor vergessen.
